# Supplementary material for: Beef Production Systems with Steers of Dairy and Dairy × Beef Breeds Based on Forage and Semi-Natural Pastures
Source: MDPI journal article supplement (doi:10.3390/ani9121064), 2019-12-02
Supplement: s1 [file s1]

## Supplementary Data

Table S1. Group data on purebred dairy and dairy x beef steers in forage and pasture-based production systems, where spring-born cattle were kept on a moderately high indoor feed intensity and slaughtered at 21 months of age, while autumn-born cattle were kept on a low indoor feed intensity and slaughtered at 28 months of age. (IP = indoor period)

| Pen. no                                         | 13     | 14     | 15     | 16     | 17     | 18     | 19     | 20     |
|-------------------------------------------------|--------|--------|--------|--------|--------|--------|--------|--------|
| Breed <sup>a</sup>                              | 1      | 2      | 1      | 2      | 1      | 2      | 1      | 2      |
| Production system <sup>b</sup>                  | 1      | 1      | 1      | 1      | 1      | 1      | 1      | 1      |
| Pen pair, no.                                   | 1      | 1      | 2      | 2      | 3      | 3      | 4      | 4      |
| Parasites <sup>c</sup>                          | 1      | 1      | 2      | 2      | 1      | 1      | 2      | 2      |
| Dietary intake, kg of dry matter IP1            | 6.323  | 5.812  | 6.245  | 6.134  | 5.745  | 5.837  | 5.489  | 5.380  |
| Dietary intake, % of liveweight IP1             | 2.357  | 2.629  | 2.481  | 2.542  | 2.429  | 2.534  | 2.485  | 3.003  |
| Intake of neutral detergent fiber, kg IP1       | 3.427  | 3.037  | 3.358  | 3.248  | 3.040  | 3.046  | 2.843  | 2.673  |
| Feed efficiency, ME MJ g gain <sup>-1</sup> IP1 | 62.88  | 62.98  | 65.19  | 60.88  | 59.67  | 56.91  | 56.79  | 58.30  |
| Dietary intake, kg of dry matter IP2            | 11.021 | 11.308 | 12.124 | 12.111 | 12.372 | 12.133 | 11.638 | 11.472 |
| Dietary intake, % of liveweight IP2             | 0.091  | 2.211  | 2.297  | 2.346  | 2.233  | 2.166  | 2.252  | 2.428  |
| Intake of neutral detergent fiber, kg IP2       | 7.047  | 5.969  | 6.491  | 6.485  | 6.724  | 6.526  | 6.348  | 6.261  |
| Feed efficiency, ME MJ g gain <sup>-1</sup> IP2 | 114.66 | 113.50 | 117.57 | 110.69 | 103.94 | 101.99 | 103.33 | 103.08 |
| Dietary intake, kg of dry matter IP3            | .      | .      | .      | .      | .      | .      | .      | .      |
| Dietary intake, % of liveweight IP3             | .      | .      | .      | .      | .      | .      | .      | .      |
| Intake of neutral detergent fiber, kg IP3       | .      | .      | .      | .      | .      | .      | .      | .      |
| Feed efficiency, ME MJ g gain <sup>-1</sup> IP3 | .      | .      | .      | .      | .      | .      | .      | .      |

<sup>a</sup>1 is dairy x beef crossbreed, 2 is dairy breed.

<sup>b</sup>1 is spring-born, moderately high indoor feed intensity with 21 months slaughter age, 2 is autumn-born, low indoor feed intensity and 28 months slaughter age.

<sup>c</sup>1 is not infected, 2 is infected.

Table S1 cont.

| Pen. no                                         | 21     | 22     | 23     | 24     | 25     | 26     | 27     | 28     |
|-------------------------------------------------|--------|--------|--------|--------|--------|--------|--------|--------|
| Breed <sup>a</sup>                              | 1      | 2      | 1      | 2      | 1      | 2      | 1      | 2      |
| Production system <sup>b</sup>                  | 2      | 2      | 2      | 2      | 2      | 2      | 2      | 2      |
| Pen pair, no.                                   | 5      | 5      | 6      | 6      | 7      | 7      | 8      | 8      |
| Parasites <sup>c</sup>                          | 2      | 2      | 2      | 2      | 1      | 1      | 1      | 1      |
| Dietary intake, kg of dry matter IP1            | 5.522  | 5.161  | 4.881  | 4.928  | 5.445  | 5.131  | 5.295  | 5.158  |
| Dietary intake, % of liveweight IP1             | 2.446  | 2.629  | 2.619  | 2.991  | 2.588  | 2.696  | 2.833  | 5.731  |
| Intake of neutral detergent fiber, kg IP1       | 2.898  | 2.613  | 2.428  | 2.376  | 2.838  | 2.592  | 2.696  | 2.531  |
| Feed efficiency, ME MJ g gain <sup>-1</sup> IP1 | 61.91  | 62.62  | 56.07  | 57.51  | 54.93  | 60.21  | 56.06  | 52.36  |
| Dietary intake, kg of dry matter IP2            | 10.619 | 9.174  | 9.165  | 9.456  | 10.995 | 8.659  | 9.850  | 9.339  |
| Dietary intake, % of liveweight IP2             | 2.255  | 2.245  | 2.159  | 2.298  | 2.363  | 2.094  | 2.286  | 2.433  |
| Intake of neutral detergent fiber, kg IP2       | 6.568  | 5.674  | 5.669  | 5.849  | 6.801  | 5.355  | 6.092  | 5.776  |
| Feed efficiency, ME MJ g gain <sup>-1</sup> IP2 | 115.75 | 124.67 | 118.33 | 119.35 | 133.61 | 117.25 | 120.09 | 126.10 |
| Dietary intake, kg of dry matter IP3            | 14.429 | 13.649 | 13.829 | 13.741 | 14.886 | 13.502 | 13.612 | 13.358 |
| Dietary intake, % of liveweight IP3             | 2.188  | 2.258  | 2.070  | 2.218  | 2.083  | 2.100  | 1.945  | 2.145  |
| Intake of neutral detergent fiber, kg IP3       | 7.820  | 7.398  | 7.518  | 7.469  | 8.190  | 7.434  | 7.699  | 7.587  |
| Feed efficiency, ME MJ g gain <sup>-1</sup> IP3 | 89.74  | 111.30 | 94.29  | 100.27 | 134.30 | 112.38 | 185.80 | 168.69 |

<sup>a</sup>1 is dairy x beef crossbreed, 2 is dairy breed.

<sup>b</sup>1 is spring-born, moderately high indoor feed intensity with 21 months slaughter age, 2 is autumn-born, low indoor feed intensity and 28 months slaughter age.

<sup>c</sup>1 is not infected, 2 is infected.

Table S2. Individual data on purebred dairy and dairy x beef steers in forage and pasture-based production systems, where spring-born cattle were kept on a moderately high feed intensity and slaughtered at 21 months of age, while autumn-born cattle were kept on a low feed intensity and slaughtered at 28 months of age (IP = indoor period, GP = grazing period)

| Animal ID                              | 8247   | 8255   | 8271   | 8286   | 8244   | 8254   | 8276   | 8294   |
|----------------------------------------|--------|--------|--------|--------|--------|--------|--------|--------|
| Date of birth                          | 150418 | 150425 | 150505 | 150509 | 150415 | 150425 | 150506 | 150511 |
| Pen no.                                | 13     | 13     | 13     | 13     | 14     | 14     | 14     | 14     |
| Breed <sup>a</sup>                     | 1      | 1      | 1      | 1      | 2      | 2      | 2      | 2      |
| Production system <sup>b</sup>         | 1      | 1      | 1      | 1      | 1      | 1      | 1      | 1      |
| Pair of calves, no                     | 1      | 2      | 3      | 4      | 1      | 2      | 3      | 4      |
| Parasites <sup>c</sup>                 | 1      | 1      | 1      | 1      | 1      | 1      | 1      | 1      |
| Weight gain IP1, kg d <sup>-1</sup>    | 1.210  | 1.072  | 1.115  | 0.991  | 0.987  | 0.982  | 1.045  | 1.066  |
| Weight gain GP1, kg d <sup>-1</sup>    | 0.243  | 0.560  | 0.577  | 0.835  | 0.412  | 0.500  | 0.539  | 0.518  |
| Weight gain IP2, kg d <sup>-1</sup>    | 1.175  | 1.349  | 1.198  | 1.127  | 1.063  | 1.012  | 0.944  | 1.123  |
| Weight gain GP2, kg d <sup>-1</sup>    | .      | .      | .      | .      | .      | .      | .      | .      |
| Weight gain IP3, kg d <sup>-1</sup>    | .      | .      | .      | .      | .      | .      | .      | .      |
| Weight gain total, kg d <sup>-1</sup>  | 0.951  | 1.003  | 0.995  | 0.982  | 0.855  | 0.864  | 0.890  | 0.937  |
| Weight at slaughter, kg                | 676.5  | 680.5  | 675.0  | 654.0  | 580.0  | 578.5  | 564.0  | 601.0  |
| Carcass weight, kg                     | 329.8  | 333.7  | 333.7  | 320.5  | 262.6  | 271.1  | 253.2  | 267.5  |
| Dressing, %                            | 48.8   | 49.0   | 49.4   | 49.0   | 45.3   | 46.9   | 44.9   | 44.5   |
| Conformation, score <sup>d</sup>       | 5      | 6      | 5      | 6      | 3      | 4      | 4      | 4      |
| Fatness, score <sup>e</sup>            | 7      | 6      | 8      | 7      | 6      | 7      | 6      | 6      |
| Marbling, score <sup>f</sup>           | 2      | 1      | 2      | 1      | 3      | 1      | 2      | 1      |
| Weight of HQ <sup>g</sup> , kg         | 84     | 84.5   | 84.5   | 81.5   | 68.5   | 69.5   | 65.5   | 69     |
| Trim fat, % of HQ                      | 4.87   | 4.39   | 7.88   | 4.61   | 7.99   | 6.81   | 6.09   | 5.78   |
| Gr. 2 meat ass. <sup>h</sup> , % of HQ | 22.1   | 23.1   | 20.6   | 22.2   | 20.2   | 20.0   | 20.6   | 21.6   |
| Gr. 3 meat ass. <sup>i</sup> , % of HQ | 11.8   | 10.2   | 12.4   | 12.0   | 9.8    | 9.6    | 11.2   | 11.4   |
| Bone, % of HQ                          | 20.8   | 20.2   | 19.1   | 19.9   | 21.4   | 22.0   | 21.7   | 21.6   |
| Retail cuts <sup>j</sup> , % of HQ     | 37.2   | 38.8   | 35.3   | 37.8   | 36.4   | 37.8   | 36.6   | 35.2   |
| Slaughter age, d                       | 648    | 641    | 631    | 627    | 651    | 641    | 630    | 625    |
| Relative age <sup>k</sup> , d          | 3      | 10     | 20     | 24     | 0      | 10     | 21     | 26     |
| Initial weight IP1, kg                 | 157    | 132.5  | 131.5  | 117.5  | 112.5  | 106.5  | 77.5   | 89     |
| Initial weight GP1, kg                 | 494    | 431    | 442    | 393.5  | 387.5  | 380    | 368.5  | 386    |
| Initial weight IP2, kg                 | 528.5  | 510.5  | 524    | 512    | 446    | 451    | 445    | 459.5  |
| Initial weight GP2, kg                 | .      | .      | .      | .      | .      | .      | .      | .      |
| Initial weight IP3, kg                 | .      | .      | .      | .      | .      | .      | .      | .      |

<sup>a</sup>1 is dairy x beef crossbreed, 2 is dairy breed.

<sup>b</sup>1 is spring-born, moderately high indoor feed intensity with 21 months slaughter age, 2 is autumn-born, low indoor feed intensity and 28 months slaughter age.

<sup>c</sup>1 is not infected, 2 is infected.

<sup>d</sup>EUROP system on a scale 1 = poor, 15 = excellent.

<sup>e</sup>EUROP system on a scale 1 = lean, 15 = fat.

<sup>f</sup>Visually determined in *Musculus longissimus dorsi* between 10<sup>th</sup> and 11<sup>th</sup> ribs on a scale 1 = lean and 5 = well marbled.

<sup>g</sup>Right hind quarter.

<sup>h</sup>Commercial cut meat assortment estimated to contain 10% fat.

<sup>i</sup>Commercial cut meat assortment estimated to contain 23% fat.

<sup>j</sup>High-value retail cuts; strip loin, fillet, topside, outside round, eye of round, top rump, and rump steak

<sup>k</sup>Relative to the oldest animal in that production system group.

Table S2 cont.

| Animal ID                              | 8299   | 8301   | 8326   | 8332   | 8296   | 8298   | 8321   | 8329   |
|----------------------------------------|--------|--------|--------|--------|--------|--------|--------|--------|
| Date of birth                          | 150514 | 150515 | 150601 | 150603 | 150513 | 150515 | 150526 | 150602 |
| Pen no.                                | 15     | 15     | 15     | 15     | 16     | 16     | 16     | 16     |
| Breed <sup>a</sup>                     | 1      | 1      | 1      | 1      | 2      | 2      | 2      | 2      |
| Production system <sup>b</sup>         | 1      | 1      | 1      | 1      | 1      | 1      | 1      | 1      |
| Pair of calves, no                     | 5      | 6      | 7      | 8      | 5      | 6      | 7      | 8      |
| Parasites <sup>c</sup>                 | 2      | 2      | 2      | 2      | 2      | 2      | 2      | 2      |
| Weight gain IP1, kg d <sup>-1</sup>    | 1.016  | 1.079  | 1.002  | 1.110  | 1.178  | 1.164  | 1.081  | 1.027  |
| Weight gain GP1, kg d <sup>-1</sup>    | 0.243  | 0.194  | 0.444  | 0.581  | 0.180  | 0.377  | 0.243  | 0.412  |
| Weight gain IP2, kg d <sup>-1</sup>    | 1.230  | 1.140  | 0.988  | 0.910  | 1.320  | 1.099  | 0.991  | 1.118  |
| Weight gain GP2, kg d <sup>-1</sup>    | .      | .      | .      | .      | .      | .      | .      | .      |
| Weight gain IP3, kg d <sup>-1</sup>    | .      | .      | .      | .      | .      | .      | .      | .      |
| Weight gain total, kg d <sup>-1</sup>  | 0.873  | 0.858  | 0.847  | 0.906  | 0.951  | 0.931  | 0.827  | 0.889  |
| Weight at slaughter, kg                | 614.0  | 631.0  | 581.0  | 636.0  | 650.0  | 634.5  | 573.0  | 574.0  |
| Carcass weight, kg                     | 302.8  | 307.2  | 291.1  | 310.2  | 300.9  | 296.5  | 264.1  | 271.5  |
| Dressing, %                            | 49.3   | 48.7   | 50.1   | 48.8   | 46.3   | 46.7   | 46.1   | 47.3   |
| Conformation, score <sup>d</sup>       | 4      | 4      | 5      | 4      | 4      | 4      | 4      | 4      |
| Fatness, score <sup>e</sup>            | 8      | 8      | 9      | 9      | 8      | 9      | 9      | 8      |
| Marbling, score <sup>f</sup>           | 2      | 1      | 1      | 1      | 2      | 1      | 2      | 1      |
| Weight of HQ <sup>g</sup> , kg         | 77.5   | 77.5   | 76     | 79.5   | 76     | 73.5   | 68.5   | 72     |
| Trim fat, % of HQ                      | 5.47   | 5.31   | 5.95   | 6.95   | 7.42   | 11.19  | 7.59   | 5.60   |
| Gr. 2 meat ass. <sup>h</sup> , % of HQ | 20.4   | 21.1   | 20.2   | 19.9   | 20.0   | 19.6   | 19.8   | 20.0   |
| Gr. 3 meat ass. <sup>i</sup> , % of HQ | 10.7   | 11.0   | 11.4   | 11.8   | 11.2   | 11.0   | 10.9   | 11.8   |
| Bone, % of HQ                          | 20.4   | 21.3   | 19.3   | 19.5   | 21.1   | 19.7   | 23.3   | 21.5   |
| Retail cuts <sup>j</sup> , % of HQ     | 39.7   | 38.1   | 38.9   | 38.7   | 36.3   | 35.2   | 35.6   | 37.9   |
| Slaughter age, d                       | 657    | 656    | 639    | 637    | 658    | 656    | 645    | 638    |
| Relative age <sup>k</sup> , d          | 29     | 30     | 47     | 49     | 28     | 30     | 41     | 48     |
| Initial weight IP1, kg                 | 155.5  | 180    | 136    | 160    | 150.5  | 145.5  | 139    | 107.5  |
| Initial weight GP1, kg                 | 381.5  | 420    | 359    | 407    | 412    | 404    | 379    | 335.5  |
| Initial weight IP2, kg                 | 416    | 447.5  | 422    | 489.5  | 437.5  | 457.5  | 413.5  | 394    |
| Initial weight GP2, kg                 | .      | .      | .      | .      | .      | .      | .      | .      |
| Initial weight IP3, kg                 | .      | .      | .      | .      | .      | .      | .      | .      |

<sup>a</sup>1 is dairy x beef crossbreed, 2 is dairy breed.

<sup>b</sup>1 is spring-born, moderately high indoor feed intensity with 21 months slaughter age, 2 is autumn-born, low indoor feed intensity and 28 months slaughter age.

<sup>c</sup>1 is not infected, 2 is infected.

<sup>d</sup>EUROP system on a scale 1 = poor, 15 = excellent.

<sup>e</sup>EUROP system on a scale 1 = lean, 15 = fat.

<sup>f</sup>Visually determined in *Musculus longissimus dorsi* between 10<sup>th</sup> and 11<sup>th</sup> ribs on a scale 1 = lean and 5 = well marbled.

<sup>g</sup>Right hind quarter.

<sup>h</sup>Commercial cut meat assortment estimated to contain 10% fat.

<sup>i</sup>Commercial cut meat assortment estimated to contain 23% fat.

<sup>j</sup>High-value retail cuts; strip loin, fillet, topside, outside round, eye of round, top rump, and rump steak

<sup>k</sup>Relative to the oldest animal in that production system group.

Table S2 cont.

| Animal ID                              | 8338   | 8359   | 8383   | 8398   | 8336   | 8352   | 8371   | 8382   |
|----------------------------------------|--------|--------|--------|--------|--------|--------|--------|--------|
| Date of birth                          | 150606 | 150618 | 150629 | 150706 | 150604 | 150614 | 150625 | 150629 |
| Pen no.                                | 17     | 17     | 17     | 17     | 18     | 18     | 18     | 18     |
| Breed <sup>a</sup>                     | 1      | 1      | 1      | 1      | 2      | 2      | 2      | 2      |
| Production system <sup>b</sup>         | 1      | 1      | 1      | 1      | 1      | 1      | 1      | 1      |
| Pair of calves, no                     | 9      | 10     | 11     | 12     | 9      | 10     | 11     | 12     |
| Parasites <sup>c</sup>                 | 1      | 1      | 1      | 1      | 1      | 1      | 1      | 1      |
| Weight gain IP1, kg d <sup>-1</sup>    | 1.243  | 1.205  | 1.070  | 0.734  | 1.302  | 1.115  | .      | 1.005  |
| Weight gain GP1, kg d <sup>-1</sup>    | 0.299  | 0.447  | 0.641  | 1.127  | 0.440  | 0.662  | .      | 0.680  |
| Weight gain IP2, kg d <sup>-1</sup>    | 1.339  | 1.208  | 1.339  | 1.068  | 1.429  | 1.071  | .      | 1.182  |
| Weight gain GP2, kg d <sup>-1</sup>    | .      | .      | .      | .      | .      | .      | .      | .      |
| Weight gain IP3, kg d <sup>-1</sup>    | .      | .      | .      | .      | .      | .      | .      | .      |
| Weight gain total, kg d <sup>-1</sup>  | 1.022  | 1.004  | 1.040  | 0.945  | 1.112  | 0.980  | .      | 0.974  |
| Weight at slaughter, kg                | 684.5  | 676.0  | 681.0  | 607.5  | 727.0  | 643.5  | .      | 621.0  |
| Carcass weight, kg                     | 327.8  | 338.1  | 323.9  | 293.5  | 333.2  | 299.9  | .      | 289.6  |
| Dressing, %                            | 47.9   | 50.0   | 47.6   | 48.3   | 45.8   | 46.6   | .      | 46.6   |
| Conformation, score <sup>d</sup>       | 6      | 6      | 5      | 6      | 5      | 5      | .      | 3      |
| Fatness, score <sup>e</sup>            | 8      | 8      | 7      | 7      | 8      | 7      | .      | 6      |
| Marbling, score <sup>f</sup>           | 1      | 2      | 1      | 2      | 3      | 3      | .      | 2      |
| Weight of HQ <sup>g</sup> , kg         | 86     | 88     | 86     | 77.5   | 84.5   | 78.5   | .      | 74     |
| Trim fat, % of HQ                      | 7.67   | 9.84   | 6.10   | 6.87   | 9.07   | 7.62   | .      | 7.03   |
| Gr. 2 meat ass. <sup>h</sup> , % of HQ | 20.7   | 18.1   | 20.2   | 20.0   | 19.7   | 19.9   | .      | 19.7   |
| Gr. 3 meat ass. <sup>i</sup> , % of HQ | 10.3   | 11.0   | 11.3   | 10.8   | 11.6   | 12.0   | .      | 10.8   |
| Bone, % of HQ                          | 20.5   | 19.8   | 20.1   | 20.1   | 20.7   | 21.2   | .      | 21.9   |
| Retail cuts <sup>j</sup> , % of HQ     | 37.6   | 38.2   | 38.9   | 38.4   | 35.3   | 36.4   | .      | 37.4   |
| Slaughter age, d                       | 641    | 629    | 618    | 611    | 643    | 633    | .      | 618    |
| Relative age <sup>k</sup> , d          | 52     | 64     | 75     | 82     | 50     | 60     | .      | 75     |
| Initial weight IP1, kg                 | 141    | 142    | 127.5  | 105    | 135.5  | 122    | .      | 103    |
| Initial weight GP1, kg                 | 417    | 409.5  | 365    | 268    | 424.5  | 369.5  | .      | 326    |
| Initial weight IP2, kg                 | 459.5  | 473    | 456    | 428    | 487    | 463.5  | .      | 422.5  |
| Initial weight GP2, kg                 | .      | .      | .      | .      | .      | .      | .      | .      |
| Initial weight IP3, kg                 | .      | .      | .      | .      | .      | .      | .      | .      |

<sup>a</sup>1 is dairy x beef crossbreed, 2 is dairy breed.

<sup>b</sup>1 is spring-born, moderately high indoor feed intensity with 21 months slaughter age, 2 is autumn-born, low indoor feed intensity and 28 months slaughter age.

<sup>c</sup>1 is not infected, 2 is infected.

<sup>d</sup>EUROP system on a scale 1 = poor, 15 = excellent.

<sup>e</sup>EUROP system on a scale 1 = lean, 15 = fat.

<sup>f</sup>Visually determined in *Musculus longissimus dorsi* between 10<sup>th</sup> and 11<sup>th</sup> ribs on a scale 1 = lean and 5 = well marbled.

<sup>g</sup>Right hind quarter.

<sup>h</sup>Commercial cut meat assortment estimated to contain 10% fat.

<sup>i</sup>Commercial cut meat assortment estimated to contain 23% fat.

<sup>j</sup>High-value retail cuts; strip loin, fillet, topside, outside round, eye of round, top rump, and rump steak

<sup>k</sup>Relative to the oldest animal in that production system group.

Table S2 cont.

| Animal ID                              | 8400   | 8404   | 8406   | 8416   | 8394   | 8399   | 8409   | 8410   |
|----------------------------------------|--------|--------|--------|--------|--------|--------|--------|--------|
| Date of birth                          | 150708 | 150709 | 150710 | 150714 | 150705 | 150706 | 150711 | 150711 |
| Pen no.                                | 19     | 19     | 19     | 19     | 20     | 20     | 20     | 20     |
| Breed <sup>a</sup>                     | 1      | 1      | 1      | 1      | 2      | 2      | 2      | 2      |
| Production system <sup>b</sup>         | 1      | 1      | 1      | 1      | 1      | 1      | 1      | 1      |
| Pair of calves, no                     | 13     | 14     | 15     | 16     | 13     | 14     | 15     | 16     |
| Parasites <sup>c</sup>                 | 2      | 2      | 2      | 2      | 2      | 2      | 2      | 2      |
| Weight gain IP1, kg d <sup>-1</sup>    | 1.146  | 1.065  | 1.063  | 1.029  | .      | 0.885  | 1.092  | 1.149  |
| Weight gain GP1, kg d <sup>-1</sup>    | 0.356  | 0.229  | 0.486  | 0.239  | .      | 0.405  | 0.451  | 0.423  |
| Weight gain IP2, kg d <sup>-1</sup>    | 1.189  | 0.980  | 1.240  | 1.202  | .      | 0.929  | 1.337  | 1.151  |
| Weight gain GP2, kg d <sup>-1</sup>    | .      | .      | .      | .      | .      | .      | .      | .      |
| Weight gain IP3, kg d <sup>-1</sup>    | .      | .      | .      | .      | .      | .      | .      | .      |
| Weight gain total, kg d <sup>-1</sup>  | 0.961  | 0.823  | 0.979  | 0.889  | .      | 0.779  | 1.015  | 0.965  |
| Weight at slaughter, kg                | 657.5  | 563.0  | 659.5  | 618.5  | .      | 526.0  | 662.0  | 625.0  |
| Carcass weight, kg                     | 321.0  | 276.4  | 326.8  | 300.4  | .      | 251.9  | 295.0  | 290.1  |
| Dressing, %                            | 48.8   | 49.1   | 49.6   | 48.6   | .      | 47.9   | 44.6   | 46.4   |
| Conformation, score <sup>d</sup>       | 5      | 4      | 5      | 4      | .      | 4      | 4      | 4      |
| Fatness, score <sup>e</sup>            | 9      | 8      | 9      | 8      | .      | 9      | 9      | 8      |
| Marbling, score <sup>f</sup>           | 2      | 1      | 1      | 1      | .      | 3      | 1      | 2      |
| Weight of HQ <sup>g</sup> , kg         | 84.4   | 73.6   | 86     | 77.6   | .      | 65.2   | 75.4   | 74.6   |
| Trim fat, % of HQ                      | 5.56   | 6.61   | 8.75   | 3.82   | .      | 8.58   | 8.58   | 6.50   |
| Gr. 2 meat ass. <sup>h</sup> , % of HQ | 19.8   | 20.0   | 17.9   | 21.0   | .      | 18.2   | 18.5   | 18.9   |
| Gr. 3 meat ass. <sup>i</sup> , % of HQ | 13.6   | 12.0   | 12.5   | 10.0   | .      | 14.0   | 12.2   | 11.2   |
| Bone, % of HQ                          | 19.3   | 21.9   | 20.2   | 23.0   | .      | 20.4   | 23.6   | 23.7   |
| Retail cuts <sup>j</sup> , % of HQ     | 38.2   | 37.4   | 36.7   | 38.3   | .      | 35.1   | 36.2   | 36.6   |
| Slaughter age, d                       | 637    | 636    | 635    | 631    | .      | 639    | 634    | 634    |
| Relative age <sup>k</sup> , d          | 84     | 85     | 86     | 90     | .      | 82     | 87     | 87     |
| Initial weight IP1, kg                 | 119.5  | 102    | 111.5  | 120.5  | 74     | 90     | 93.5   | 84.5   |
| Initial weight GP1, kg                 | 374    | 338.5  | 347.5  | 349    | 246.5  | 286.5  | 336    | 339.5  |
| Initial weight IP2, kg                 | 424.5  | 371    | 416.5  | 383    | 313.5  | 344    | 400    | 399.5  |
| Initial weight GP2, kg                 | .      | .      | .      | .      | .      | .      | .      | .      |
| Initial weight IP3, kg                 | .      | .      | .      | .      | .      | .      | .      | .      |

<sup>a</sup>1 is dairy x beef crossbreed, 2 is dairy breed.

<sup>b</sup>1 is spring-born, moderately high indoor feed intensity with 21 months slaughter age, 2 is autumn-born, low indoor feed intensity and 28 months slaughter age.

<sup>c</sup>1 is not infected, 2 is infected.

<sup>d</sup>EUROP system on a scale 1 = poor, 15 = excellent.

<sup>e</sup>EUROP system on a scale 1 = lean, 15 = fat.

<sup>f</sup>Visually determined in *Musculus longissimus dorsi* between 10<sup>th</sup> and 11<sup>th</sup> ribs on a scale 1 = lean and 5 = well marbled.

<sup>g</sup>Right hind quarter.

<sup>h</sup>Commercial cut meat assortment estimated to contain 10% fat.

<sup>i</sup>Commercial cut meat assortment estimated to contain 23% fat.

<sup>j</sup>High-value retail cuts; strip loin, fillet, topside, outside round, eye of round, top rump, and rump steak

<sup>k</sup>Relative to the oldest animal in that production system group.

Table S2 cont.

| Animal ID                              | 8419   | 8423   | 8488   | 8491   | 8413   | 8414   | 8425   | 8476   |
|----------------------------------------|--------|--------|--------|--------|--------|--------|--------|--------|
| Date of birth                          | 150715 | 150717 | 150814 | 150817 | 150712 | 150712 | 150717 | 150807 |
| Pen no.                                | 21     | 21     | 21     | 21     | 22     | 22     | 22     | 22     |
| Breed <sup>a</sup>                     | 1      | 1      | 1      | 1      | 2      | 2      | 2      | 2      |
| Production system <sup>b</sup>         | 2      | 2      | 2      | 2      | 2      | 2      | 2      | 2      |
| Pair of calves, no                     | 17     | 18     | 19     | 20     | 17     | 18     | 19     | 20     |
| Parasites <sup>c</sup>                 | 2      | 2      | 2      | 2      | 2      | 2      | 2      | 2      |
| Weight gain IP1, kg d <sup>-1</sup>    | 0.822  | 1.092  | 1.306  | 0.770  | 0.839  | 0.933  | 1.069  | 0.875  |
| Weight gain GP1, kg d <sup>-1</sup>    | 0.299  | 0.194  | 0.468  | 0.651  | 0.137  | 0.532  | 0.482  | 0.183  |
| Weight gain IP2, kg d <sup>-1</sup>    | 0.765  | 0.931  | 0.892  | 0.521  | 0.465  | 0.645  | 0.650  | 0.733  |
| Weight gain GP2, kg d <sup>-1</sup>    | 0.451  | 0.260  | 0.383  | 0.532  | 0.120  | 0.438  | 0.286  | 0.695  |
| Weight gain IP3, kg d <sup>-1</sup>    | 1.795  | 2.125  | 2.179  | 0.848  | .      | 1.357  | 1.884  | 0.732  |
| Weight gain total, kg d <sup>-1</sup>  | 0.698  | 0.769  | 0.887  | 0.627  | .      | 0.704  | 0.736  | 0.655  |
| Weight at slaughter, kg                | 635    | 739    | 825    | 581    | .      | 652    | 683    | 597.5  |
| Carcass weight, kg                     | 289.1  | 362.6  | 388.1  | 292.0  | .      | 294    | 315.6  | 275.4  |
| Dressing, %                            | 45.6   | 49.1   | 47.1   | 50.3   | .      | 45.092 | 46.2   | 46.1   |
| Conformation, score <sup>d</sup>       | 5      | 7      | 7      | 5      | .      | 4      | 4      | 4      |
| Fatness, score <sup>e</sup>            | 4      | 7      | 7      | 5      | .      | 5      | 7      | 5      |
| Marbling, score <sup>f</sup>           | 1      | 1      | 1      | 1      | .      | 2      | 1      | 1      |
| Weight of HQ <sup>g</sup> , kg         | 73.8   | 92.8   | 96.8   | 71.4   | .      | 72.4   | 77.4   | 68     |
| Trim fat, % of HQ                      | 4.58   | 8.73   | 8.64   | 4.85   | .      | 8.12   | 9.07   | 6.71   |
| Gr. 2 meat ass. <sup>h</sup> , % of HQ | 27.2   | 23.4   | 23.8   | 25.6   | .      | 22.8   | 24.5   | 24.1   |
| Gr. 3 meat ass. <sup>i</sup> , % of HQ | 4.8    | 7.0    | 6.9    | 5.7    | .      | 6.0    | 5.3    | 5.7    |
| Bone, % of HQ                          | 21.5   | 19.9   | 20.5   | 21.0   | .      | 22.2   | 21.3   | 22.0   |
| Retail cuts <sup>j</sup> , % of HQ     | 40.2   | 39.2   | 38.6   | 41.1   | .      | 39.8   | 38.0   | 40.1   |
| Slaughter age, d                       | 861    | 859    | 831    | 828    | .      | 864    | 859    | 838    |
| Relative age <sup>k</sup> , d          | 3      | 5      | 33     | 36     | .      | 0      | 5      | 26     |
| Initial weight IP1, kg                 | 131    | 184.5  | 185    | 129    | 112.5  | 125    | 131.5  | 107    |
| Initial weight GP1, kg                 | 256    | 350.5  | 383.5  | 246    | 263.5  | 293    | 324    | 264.5  |
| Initial weight IP2, kg                 | 298.5  | 378    | 450    | 338.5  | 283    | 368.5  | 392.5  | 290.5  |
| Initial weight GP2, kg                 | 464.5  | 580    | 643.5  | 451.5  | 384    | 508.5  | 533.5  | 449.5  |
| Initial weight IP3, kg                 | 534    | 620    | 702.5  | 533.5  | 402.5  | 576    | 577.5  | 556.5  |

<sup>a</sup>1 is dairy x beef crossbreed, 2 is dairy breed.

<sup>b</sup>1 is spring-born, moderately high indoor feed intensity with 21 months slaughter age, 2 is autumn-born, low indoor feed intensity and 28 months slaughter age.

<sup>c</sup>1 is not infected, 2 is infected.

<sup>d</sup>EUROP system on a scale 1 = poor, 15 = excellent.

<sup>e</sup>EUROP system on a scale 1 = lean, 15 = fat.

<sup>f</sup>Visually determined in *Musculus longissimus dorsi* between 10<sup>th</sup> and 11<sup>th</sup> ribs on a scale 1 = lean and 5 = well marbled.

<sup>g</sup>Right hind quarter.

<sup>h</sup>Commercial cut meat assortment estimated to contain 10% fat.

<sup>i</sup>Commercial cut meat assortment estimated to contain 23% fat.

<sup>j</sup>High-value retail cuts; strip loin, fillet, topside, outside round, eye of round, top rump, and rump steak

<sup>k</sup>Relative to the oldest animal in that production system group.

Table S2 cont.

| Animal ID                              | 8499   | 8510   | 8525   | 8533   | 8485   | 8492   | 8511   | 8515   |
|----------------------------------------|--------|--------|--------|--------|--------|--------|--------|--------|
| Date of birth                          | 150820 | 150828 | 150904 | 150913 | 150812 | 150817 | 150828 | 150830 |
| Pen no.                                | 23     | 23     | 23     | 23     | 24     | 24     | 24     | 24     |
| Breed <sup>a</sup>                     | 1      | 1      | 1      | 1      | 2      | 2      | 2      | 2      |
| Production system <sup>b</sup>         | 2      | 2      | 2      | 2      | 2      | 2      | 2      | 2      |
| Pair of calves, no                     | 21     | 22     | 23     | 24     | 21     | 22     | 23     | 24     |
| Parasites <sup>c</sup>                 | 2      | 2      | 2      | 2      | 2      | 2      | 2      | 2      |
| Weight gain IP1, kg d <sup>-1</sup>    | 1.158  | 0.865  | 0.888  | 1.049  | 0.789  | 1.217  | 0.901  | 1.026  |
| Weight gain GP1, kg d <sup>-1</sup>    | 0.634  | 0.197  | 0.694  | 0.644  | 0.715  | 0.507  | 0.461  | 0.585  |
| Weight gain IP2, kg d <sup>-1</sup>    | 0.813  | 0.548  | 0.680  | 0.583  | 0.696  | 0.712  | 0.645  | 0.631  |
| Weight gain GP2, kg d <sup>-1</sup>    | 0.370  | 0.831  | 0.692  | 0.802  | 0.403  | 0.588  | 0.295  | 0.601  |
| Weight gain IP3, kg d <sup>-1</sup>    | 1.685  | 1.446  | 1.482  | 1.738  | 1.351  | 1.696  | 1.321  | 1.565  |
| Weight gain total, kg d <sup>-1</sup>  | 0.856  | 0.705  | 0.817  | 0.864  | 0.732  | 0.860  | 0.666  | 0.801  |
| Weight at slaughter, kg                | 764.5  | 642    | 705.5  | 768    | 633    | 772    | 595    | 681    |
| Carcass weight, kg                     | 363.6  | 308.7  | 331.7  | 362.6  | 282.2  | 352.3  | 272    | 295    |
| Dressing, %                            | 47.6   | 48.1   | 47.0   | 47.2   | 44.6   | 45.6   | 45.7   | 43.3   |
| Conformation, score <sup>d</sup>       | 7      | 7      | 6      | 7      | 5      | 4      | 4      | 4      |
| Fatness, score <sup>e</sup>            | 7      | 7      | 7      | 8      | 7      | 8      | 7      | 6      |
| Marbling, score <sup>f</sup>           | 1      | 1      | 1      | 2      | 2      | 3      | 2      | 1      |
| Weight of HQ <sup>g</sup> , kg         | 93.6   | 79.8   | 84.8   | 94.4   | 72.4   | 88.4   | 69.2   | 75.2   |
| Trim fat, % of HQ                      | 8.31   | 6.37   | 7.74   | 8.22   | 8.20   | 10.02  | 10.55  | 7.69   |
| Gr. 2 meat ass. <sup>h</sup> , % of HQ | 23.3   | 25.7   | 24.6   | 26.8   | 23.3   | 24.0   | 24.1   | 21.7   |
| Gr. 3 meat ass. <sup>i</sup> , % of HQ | 6.4    | 5.6    | 5.0    | 5.0    | 5.6    | 5.2    | 5.7    | 7.0    |
| Bone, % of HQ                          | 19.7   | 20.1   | 21.0   | 18.7   | 21.3   | 21.4   | 19.2   | 21.8   |
| Retail cuts <sup>j</sup> , % of HQ     | 39.0   | 40.0   | 38.2   | 40.2   | 37.9   | 36.1   | 36.3   | 37.4   |
| Slaughter age, d                       | 853    | 845    | 838    | 829    | 861    | 856    | 845    | 843    |
| Relative age <sup>k</sup> , d          | 39     | 47     | 54     | 63     | 31     | 36     | 47     | 49     |
| Initial weight IP1, kg                 | 123.5  | 114    | 93.5   | 121    | 85     | 127.5  | 96     | 81     |
| Initial weight GP1, kg                 | 299.5  | 245.5  | 228.5  | 280.5  | 205    | 312.5  | 233    | 237    |
| Initial weight IP2, kg                 | 389.5  | 273.5  | 327    | 372    | 306.5  | 384.5  | 298.5  | 320    |
| Initial weight GP2, kg                 | 566    | 392.5  | 474.5  | 498.5  | 457.5  | 539    | 438.5  | 457    |
| Initial weight IP3, kg                 | 623    | 520.5  | 581    | 622    | 519.5  | 629.5  | 484    | 549.5  |

<sup>a</sup>1 is dairy x beef crossbreed, 2 is dairy breed.

<sup>b</sup>1 is spring-born, moderately high indoor feed intensity with 21 months slaughter age, 2 is autumn-born, low indoor feed intensity and 28 months slaughter age.

<sup>c</sup>1 is not infected, 2 is infected.

<sup>d</sup>EUROP system on a scale 1 = poor, 15 = excellent.

<sup>e</sup>EUROP system on a scale 1 = lean, 15 = fat.

<sup>f</sup>Visually determined in *Musculus longissimus dorsi* between 10<sup>th</sup> and 11<sup>th</sup> ribs on a scale 1 = lean and 5 = well marbled.

<sup>g</sup>Right hind quarter.

<sup>h</sup>Commercial cut meat assortment estimated to contain 10% fat.

<sup>i</sup>Commercial cut meat assortment estimated to contain 23% fat.

<sup>j</sup>High-value retail cuts; strip loin, fillet, topside, outside round, eye of round, top rump, and rump steak

<sup>k</sup>Relative to the oldest animal in that production system group.



Table S2 cont.

| Animal ID                              | 8540   | 8560   | 8577   | 8587   | 8522   | 8545   | 8559   | 8562   |
|----------------------------------------|--------|--------|--------|--------|--------|--------|--------|--------|
| Date of birth                          | 150913 | 150921 | 151003 | 151008 | 150902 | 150915 | 150920 | 150922 |
| Pen no.                                | 25     | 25     | 25     | 25     | 26     | 26     | 26     | 26     |
| Breed <sup>a</sup>                     | 1      | 1      | 1      | 1      | 2      | 2      | 2      | 2      |
| Production system <sup>b</sup>         | 2      | 2      | 2      | 2      | 2      | 2      | 2      | 2      |
| Pair of calves, no                     | 25     | 26     | 27     | 28     | 25     | 26     | 27     | 28     |
| Parasites <sup>c</sup>                 | 1      | 1      | 1      | 1      | 1      | 1      | 1      | 1      |
| Weight gain IP1, kg d <sup>-1</sup>    | 1.028  | 0.848  | 1.219  | 1.360  | 0.833  | 0.974  | 1.104  | 0.953  |
| Weight gain GP1, kg d <sup>-1</sup>    | 0.835  | 0.937  | 0.746  | 0.782  | 0.683  | 0.859  | 0.648  | 0.637  |
| Weight gain IP2, kg d <sup>-1</sup>    | 0.700  | 0.661  | 0.689  | 0.737  | 0.532  | 0.606  | 0.668  | 0.696  |
| Weight gain GP2, kg d <sup>-1</sup>    | 1.136  | 1.175  | 1.169  | 1.448  | 0.721  | 0.692  | 0.347  | 0.370  |
| Weight gain IP3, kg d <sup>-1</sup>    | 1.009  | 1.161  | 1.259  | 1.362  | 1.063  | 1.116  | 1.531  | 1.482  |
| Weight gain total, kg d <sup>-1</sup>  | 0.804  | 0.815  | 0.798  | 0.857  | 0.725  | 0.802  | 0.788  | 0.771  |
| Weight at slaughter, kg                | 749    | 693    | 746    | 816.5  | 685.5  | 710.5  | 715.5  | 683.5  |
| Carcass weight, kg                     | 369    | 339.6  | 367    | 417.5  | 308.7  | 333.7  | 321.4  | 304.3  |
| Dressing, %                            | 49.3   | 49.0   | 49.2   | 51.1   | 45.0   | 47.0   | 44.9   | 44.5   |
| Conformation, score <sup>d</sup>       | 6      | 7      | 7      | 6      | 4      | 4      | 4      | 4      |
| Fatness, score <sup>e</sup>            | 8      | 8      | 7      | 8      | 7      | 8      | 8      | 7      |
| Marbling, score <sup>f</sup>           | 3      | 2      | 2      | 2      | 1      | 1      | 2      | 2      |
| Weight of HQ <sup>g</sup> , kg         | 91     | 86.8   | 94.6   | 105.6  | 77.4   | 86.6   | 81.6   | 76.8   |
| Trim fat, % of HQ                      | 8.88   | 8.53   | 8.12   | 9.51   | 7.52   | 8.73   | 8.92   | 8.18   |
| Gr. 2 meat ass. <sup>h</sup> , % of HQ | 23.5   | 25.5   | 24.4   | 23.7   | 23.0   | 21.2   | 24.6   | 26.0   |
| Gr. 3 meat ass. <sup>i</sup> , % of HQ | 6.5    | 7.6    | 6.9    | 6.1    | 7.1    | 7.6    | 6.3    | 7.4    |
| Bone, % of HQ                          | 20.1   | 18.1   | 18.5   | 19.5   | 22.3   | 20.8   | 20.3   | 19.5   |
| Retail cuts <sup>j</sup> , % of HQ     | 32.6   | 36.8   | 38.9   | 38.1   | 36.1   | 38.3   | 36.7   | 36.1   |
| Slaughter age, d                       | 857    | 849    | 837    | 832    | 868    | 855    | 850    | 848    |
| Relative age <sup>k</sup> , d          | 63     | 71     | 83     | 88     | 52     | 65     | 70     | 72     |
| Initial weight IP1, kg                 | 175    | 111    | 176.5  | 204.5  | 163    | 132    | 147.5  | 127.5  |
| Initial weight GP1, kg                 | 266.5  | 186.5  | 285    | 325.5  | 243    | 225.5  | 253.5  | 219    |
| Initial weight IP2, kg                 | 385    | 319.5  | 391    | 436.5  | 340    | 347.5  | 345.5  | 309.5  |
| Initial weight GP2, kg                 | 537    | 463    | 540.5  | 596.5  | 455.5  | 479    | 490.5  | 460.5  |
| Initial weight IP3, kg                 | 636    | 563    | 605    | 664    | 566.5  | 585.5  | 544    | 517.5  |

<sup>a</sup>1 is dairy x beef crossbreed, 2 is dairy breed.

<sup>b</sup>1 is spring-born, moderately high indoor feed intensity with 21 months slaughter age, 2 is autumn-born, low indoor feed intensity and 28 months slaughter age.

<sup>c</sup>1 is not infected, 2 is infected.

<sup>d</sup>EUROP system on a scale 1 = poor, 15 = excellent.

<sup>e</sup>EUROP system on a scale 1 = lean, 15 = fat.

<sup>f</sup>Visually determined in *Musculus longissimus dorsi* between 10<sup>th</sup> and 11<sup>th</sup> ribs on a scale 1 = lean and 5 = well marbled.

<sup>g</sup>Right hind quarter.

<sup>h</sup>Commercial cut meat assortment estimated to contain 10% fat.

<sup>i</sup>Commercial cut meat assortment estimated to contain 23% fat.

<sup>j</sup>High-value retail cuts; strip loin, fillet, topside, outside round, eye of round, top rump, and rump steak

<sup>k</sup>Relative to the oldest animal in that production system group.

Table S2 cont.

| Animal ID                              | 8606   | 8620   | 8642   | 8646   | 8592   | 8600   | 8626   | 8636   |
|----------------------------------------|--------|--------|--------|--------|--------|--------|--------|--------|
| Date of birth                          | 151016 | 151026 | 151104 | 151107 | 151011 | 151014 | 151027 | 151101 |
| Pen no.                                | 27     | 27     | 27     | 27     | 28     | 28     | 28     | 28     |
| Breed <sup>a</sup>                     | 1      | 1      | 1      | 1      | 2      | 2      | 2      | 2      |
| Production system <sup>b</sup>         | 2      | 2      | 2      | 2      | 2      | 2      | 2      | 2      |
| Pair of calves, no                     | 29     | 30     | 31     | 32     | 29     | 30     | 31     | 32     |
| Parasites <sup>c</sup>                 | 1      | 1      | 1      | 1      | 1      | 1      | 1      | 1      |
| Weight gain IP1, kg d <sup>-1</sup>    | 1.135  | 1.185  | 1.006  | 0.949  | 1.177  | 1.182  | 0.906  | 1.238  |
| Weight gain GP1, kg d <sup>-1</sup>    | 0.803  | 0.817  | 0.884  | 0.803  | 0.588  | 0.655  | 0.338  | 0.796  |
| Weight gain IP2, kg d <sup>-1</sup>    | 0.643  | 0.825  | 0.654  | 0.657  | 0.654  | 0.601  | 0.523  | 0.730  |
| Weight gain GP2, kg d <sup>-1</sup>    | 0.581  | 0.594  | 0.578  | 0.779  | 0.581  | 0.695  | 0.545  | 0.526  |
| Weight gain IP3, kg d <sup>-1</sup>    | 0.449  | 0.891  | 0.833  | 0.963  | 0.776  | 0.602  | 0.874  | 1.133  |
| Weight gain total, kg d <sup>-1</sup>  | 0.681  | 0.832  | 0.759  | 0.804  | 0.717  | 0.704  | 0.610  | 0.991  |
| Weight at slaughter, kg                | 667.5  | 779.5  | 703    | 723.5  | 672    | 661.5  | 564    | 749    |
| Carcass weight, kg                     | 354.8  | 407.7  | 364.6  | 365.1  | 323.4  | 318    | 244    | 338.6  |
| Dressing, %                            | 53.2   | 52.3   | 51.9   | 50.5   | 48.1   | 48.1   | 43.3   | 45.2   |
| Conformation, score <sup>d</sup>       | 6      | 7      | 6      | 6      | 4      | 3      | 2      | 3      |
| Fatness, score <sup>e</sup>            | 7      | 8      | 8      | 6      | 7      | 7      | 6      | 6      |
| Marbling, score <sup>f</sup>           | 3      | 3      | 2      | 1      | 5      | 3      | 2      | 1      |
| Weight of HQ <sup>g</sup> , kg         | 89.4   | 102.6  | 93.2   | 92.8   | 80     | 78.4   | 62.2   | 83.4   |
| Trim fat, % of HQ                      | 6.80   | 7.58   | 6.14   | 6.94   | 5.98   | 6.68   | 6.62   | 6.67   |
| Gr. 2 meat ass. <sup>h</sup> , % of HQ | 19.3   | 18.5   | 19.7   | 23.0   | 18.1   | 17.9   | 19.3   | 21.1   |
| Gr. 3 meat ass. <sup>i</sup> , % of HQ | 11.1   | 11.8   | 11.4   | 7.6    | 12.4   | 14.0   | 10.4   | 10.4   |
| Bone, % of HQ                          | 21.3   | 19.9   | 21.2   | 20.2   | 22.4   | 21.4   | 23.8   | 22.3   |
| Retail cuts <sup>j</sup> , % of HQ     | 38.2   | 38.3   | 37.9   | 38.7   | 36.9   | 36.2   | 35.7   | 35.6   |
| Slaughter age, d                       | 859    | 849    | 840    | 837    | 864    | 861    | 848    | 843    |
| Relative age <sup>k</sup> , d          | 96     | 106    | 115    | 118    | 91     | 94     | 107    | 112    |
| Initial weight IP1, kg                 | 157.5  | 156.5  | 134.5  | 121    | 130    | 129    | 103    | 128.5  |
| Initial weight GP1, kg                 | 258.5  | 262    | 224    | 205.5  | 243    | 242.5  | 190    | 230    |
| Initial weight IP2, kg                 | 372.5  | 378    | 349.5  | 319.5  | 326.5  | 335.5  | 238    | 343    |
| Initial weight GP2, kg                 | 512    | 557    | 491.5  | 462    | 468.5  | 466    | 351.5  | 501.5  |
| Initial weight IP3, kg                 | 601.5  | 648.5  | 580.5  | 582    | 558    | 573    | 435.5  | 582.5  |

<sup>a</sup>1 is dairy x beef crossbreed, 2 is dairy breed.

<sup>b</sup>1 is spring-born, moderately high indoor feed intensity with 21 months slaughter age, 2 is autumn-born, low indoor feed intensity and 28 months slaughter age.

<sup>c</sup>1 is not infected, 2 is infected.

<sup>d</sup>EUROP system on a scale 1 = poor, 15 = excellent.

<sup>e</sup>EUROP system on a scale 1 = lean, 15 = fat.

<sup>f</sup>Visually determined in *Musculus longissimus dorsi* between 10<sup>th</sup> and 11<sup>th</sup> ribs on a scale 1 = lean and 5 = well marbled.

<sup>g</sup>Right hind quarter.

<sup>h</sup>Commercial cut meat assortment estimated to contain 10% fat.

<sup>i</sup>Commercial cut meat assortment estimated to contain 23% fat.

<sup>j</sup>High-value retail cuts; strip loin, fillet, topside, outside round, eye of round, top rump, and rump steak

<sup>k</sup>Relative to the oldest animal in that production system group.
